# Supplementary material for: Large scale ZrS2 atomically thin layers
Source: Royal Society of Chemistry journal article supplement (doi:10.1039/c6tc00254d), 2016-01-01
Supplement: c6tc00254d1.pdf [file c6tc00254d1.pdf]

Electronic Supplementary Information:

## Large Scale ZrS<sub>2</sub> Atomically Thin Layers

Xiaoting Wang, Le Huang, Xiang-Wei Jiang, Yan Li, Zhongming Wei,\* Jingbo Li\*

*State Key Laboratory of Superlattices and Microstructures, Institute of Semiconductors,  
Chinese Academy of Sciences, P.O. Box 912, Beijing 100083, China.*

E-mail: [zmwei@semi.ac.cn](mailto:zmwei@semi.ac.cn); [jbli@semi.ac.cn](mailto:jbli@semi.ac.cn)

### S1: energy dispersive X-ray spectroscopy of the ZrS<sub>2</sub> nanoflake:

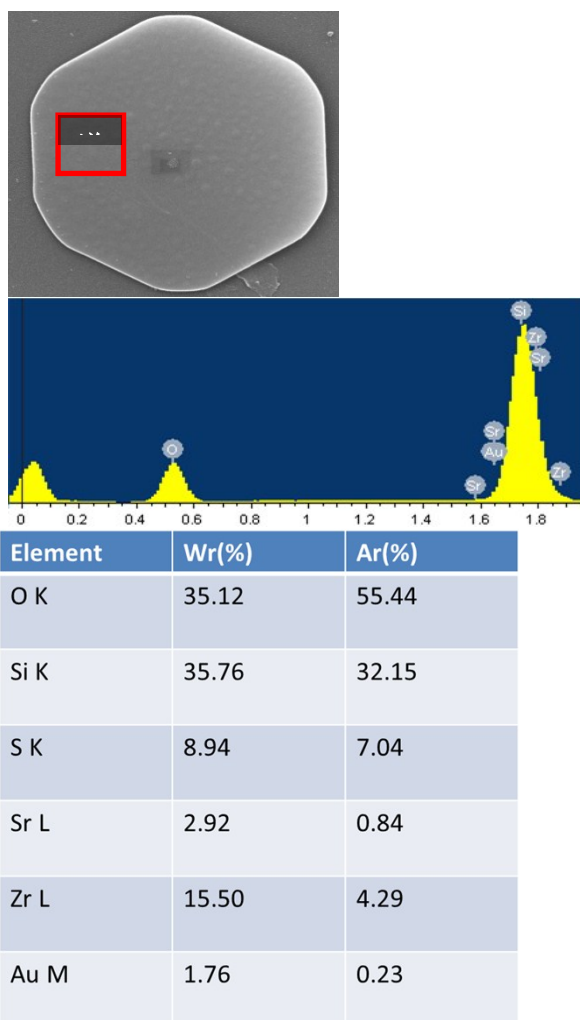

**Figure S1.** Energy dispersive X-ray spectroscopy of the ZrS<sub>2</sub> nanoflake. From the table about the weight and atoms percentages, we can figure out the existence of S and Zr elements with an atom ratio of 1:1.7. Sr, Au are the impurity element along with the tweezer and Si, O are the element on the substrate.

## S2: Reactor-conditions-dependent ZrS<sub>2</sub> growth with varying temperature and flow rate of nitrogen:

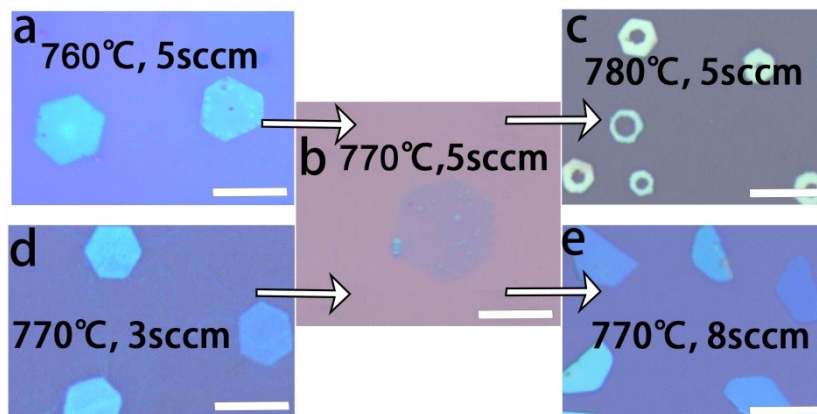

**Figure S2.** Optical microscope images of ZrS<sub>2</sub> samples grown at different temperature under designed flow rate for 6 min: (a) 760 °C; (b) 770 °C; (c) 830 °C; (d)770 °C, 3 sccm; (e) 770 °C, 5 sccm; (f) 770 °C, 8 sccm.

## S3: XPS data for the as-synthesized ZrS<sub>2</sub> nanoflakes:

The XPS has also been measured and found that the atomic composition was ZrS<sub>1.1.9</sub>, in approximate agreement with the ratio of ZrS<sub>2</sub> (Table S1). But due to the relatively low-density ZrS<sub>2</sub> nanoflakes on silica, the XPS peak is a bit rough and unapparent, especially the sulfur peaks (Fig. S3a-c). The atomic concentration  $n$  can be expressed as  $n=I/S$  ( $I$  is the area of the element peak,  $S$  is the Atomic sensitivity factor). Based on the data from the Table R1,  $S_S$  and  $S_{Zr}$  is 1.881 and 9.032, respectively. Thus in spite of higher  $n_S$  than  $n_{Zr}$ , lower  $S_S$  result in the unapparent sulfur element peak.

Table S1. Summary of the ZrS<sub>2</sub> nanoflakes XPS peak.

| Name | FWHM eV | Area (P)<br>CPS.eV | Area (N) TPP-<br>2M | Atomic % | SF<br>ALTHERMO1 |
|------|---------|--------------------|---------------------|----------|-----------------|
| Si2p | 1.57    | 5818.1             | 0.14                | 16.35    | 0.9             |
| S2p  | 0.2     | 1021.98            | 0.01                | 1.39     | 1.881           |
| Zr3d | 1.25    | 2572.22            | 0.01                | 0.73     | 9.032           |
| C1s  | 1.64    | 13328.56           | 0.3                 | 34.99    | 1               |
| O1s  | 1.69    | 47768.3            | 0.4                 | 46.54    | 2.881           |

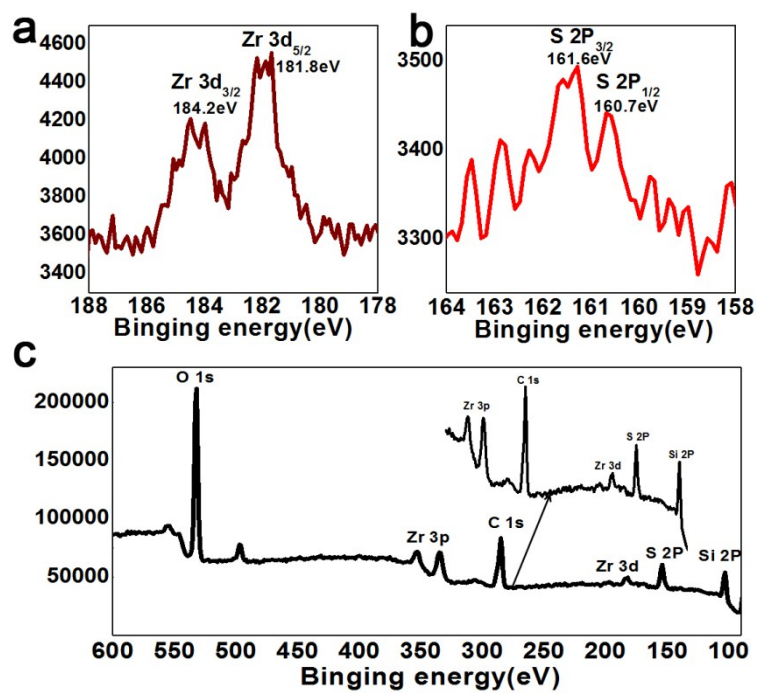

Figure S3. XPS spectra of as-synthesized ZrS<sub>2</sub>.
